# Supplementary material for: A novel ALDH1A1 Inhibitor Blocks Platinum-Induced Senescence and Stemness in Ovarian Cancer
Source: Preprints.org preprint supplement (doi:10.20944/preprints202205.0001.v1), 2022-05-02

C629-0100

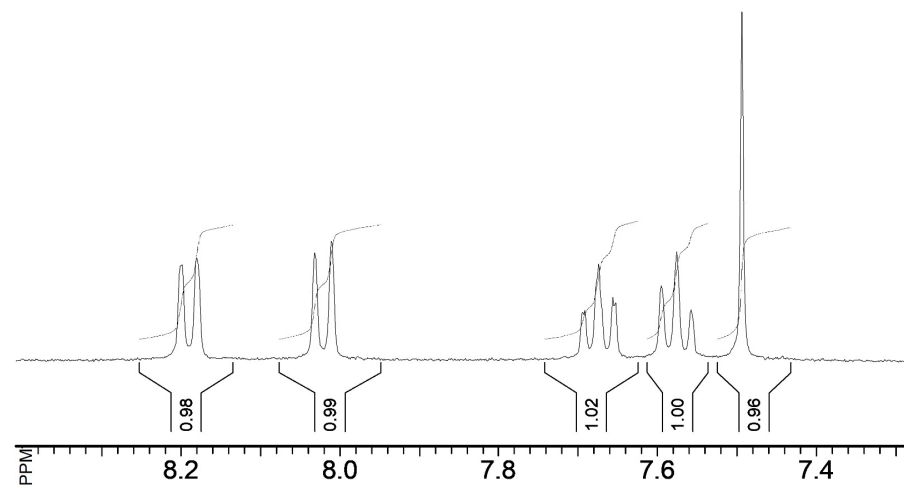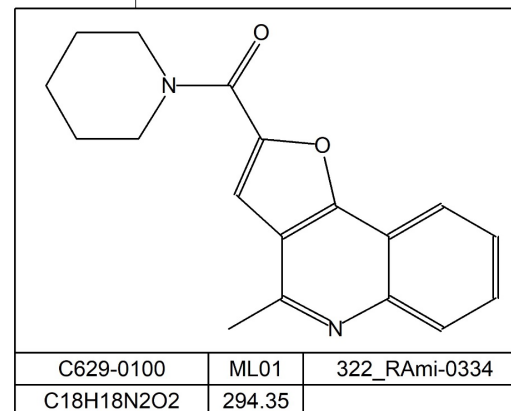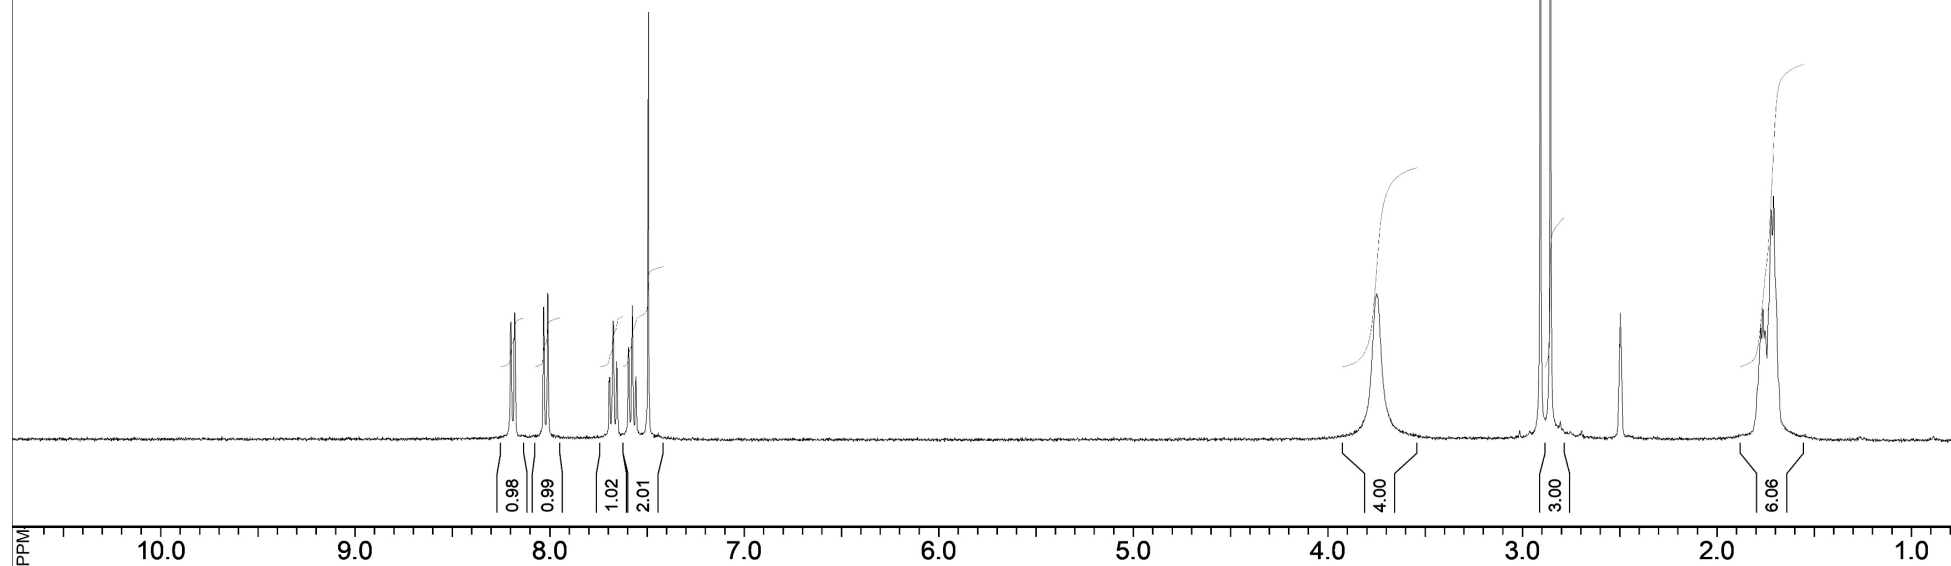

|                      |                         |                  |           |                                   |                                   |
|----------------------|-------------------------|------------------|-----------|-----------------------------------|-----------------------------------|
| File name: C629-0100 | Operator: PEB           | SF: 399.9525 MHz | NSC: 12   | PW: 12.00 usec, RG: 28, SI: 16384 | Grade: OK(00)                     |
| Date: 24-Apr-2003    | Solvent: DMSO-d6 + CCl4 | SW: 7502 Hz      | TE: 300 K | AQ: 1.09 sec, RD: 1.50 sec        | * C629- 0100. 24- Apr - 2003. 00* |

B0526160 DMSO-D6/CCL4=2:1 DSh

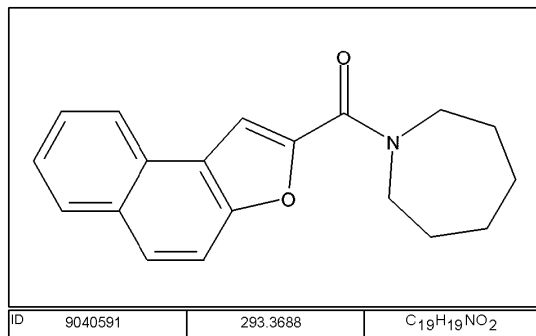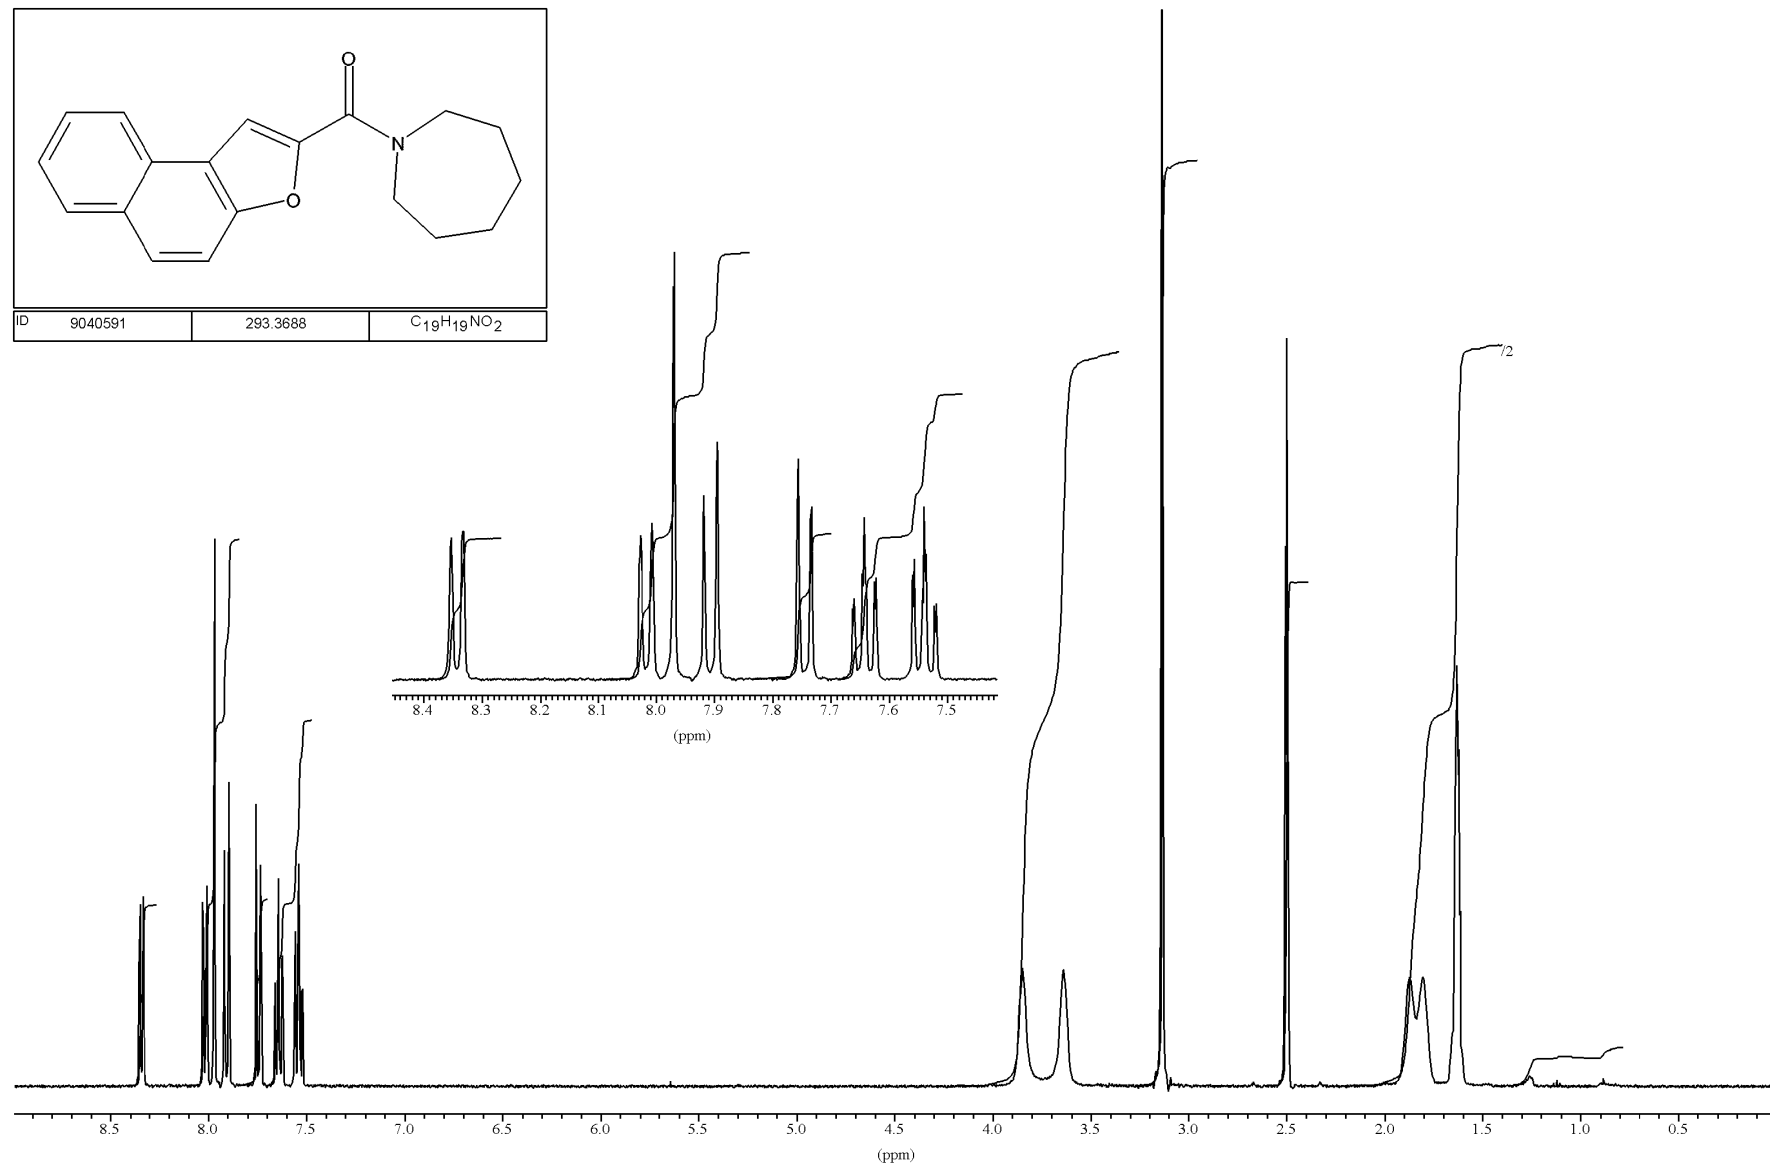

C893-0789

CC1(C)OC(=O)C2=C(C1)C=C(C2)C3=C(C)OC(=O)N3CCCCC3

|           |        |     |
|-----------|--------|-----|
| C893-0789 | jan04  | Kov |
| C21H25NO4 | 355.43 |     |

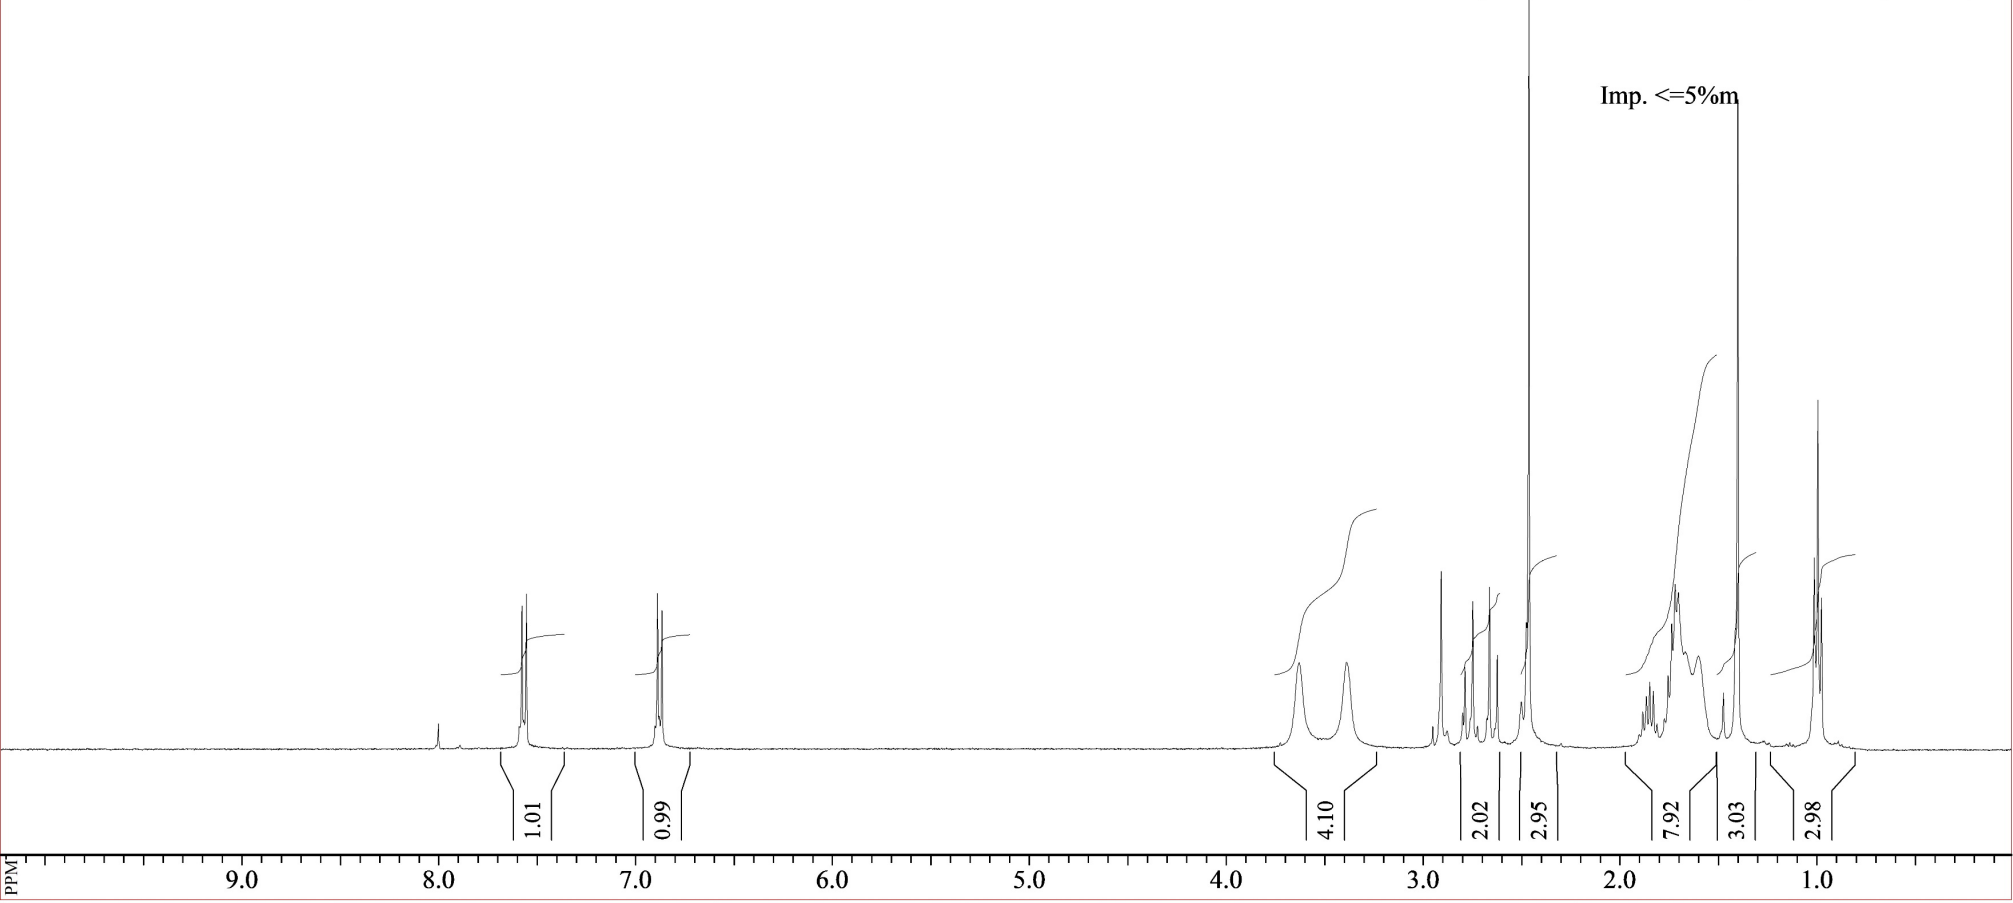

|                      |                            |                  |           |                                   |                                  |
|----------------------|----------------------------|------------------|-----------|-----------------------------------|----------------------------------|
| File name: C893-0789 | Operator: NVV, Expert: NVV | SF: 399.9525 MHz | NSC: 12   | PW: 12.00 usec, RG: 23, SI: 16384 | Grade: OK(00)                    |
| Date: 30-Dec-2003    | Solvent: DMSO + CCl4       | SW: 7502 Hz      | TE: 300 K | AQ: 1.09 sec, RD: 1.50 sec        | * C893- 0789. 30- Dec- 2003. 00* |

E003-0027

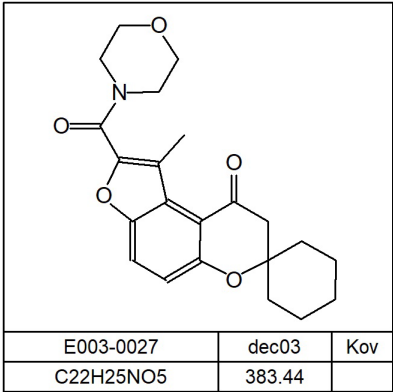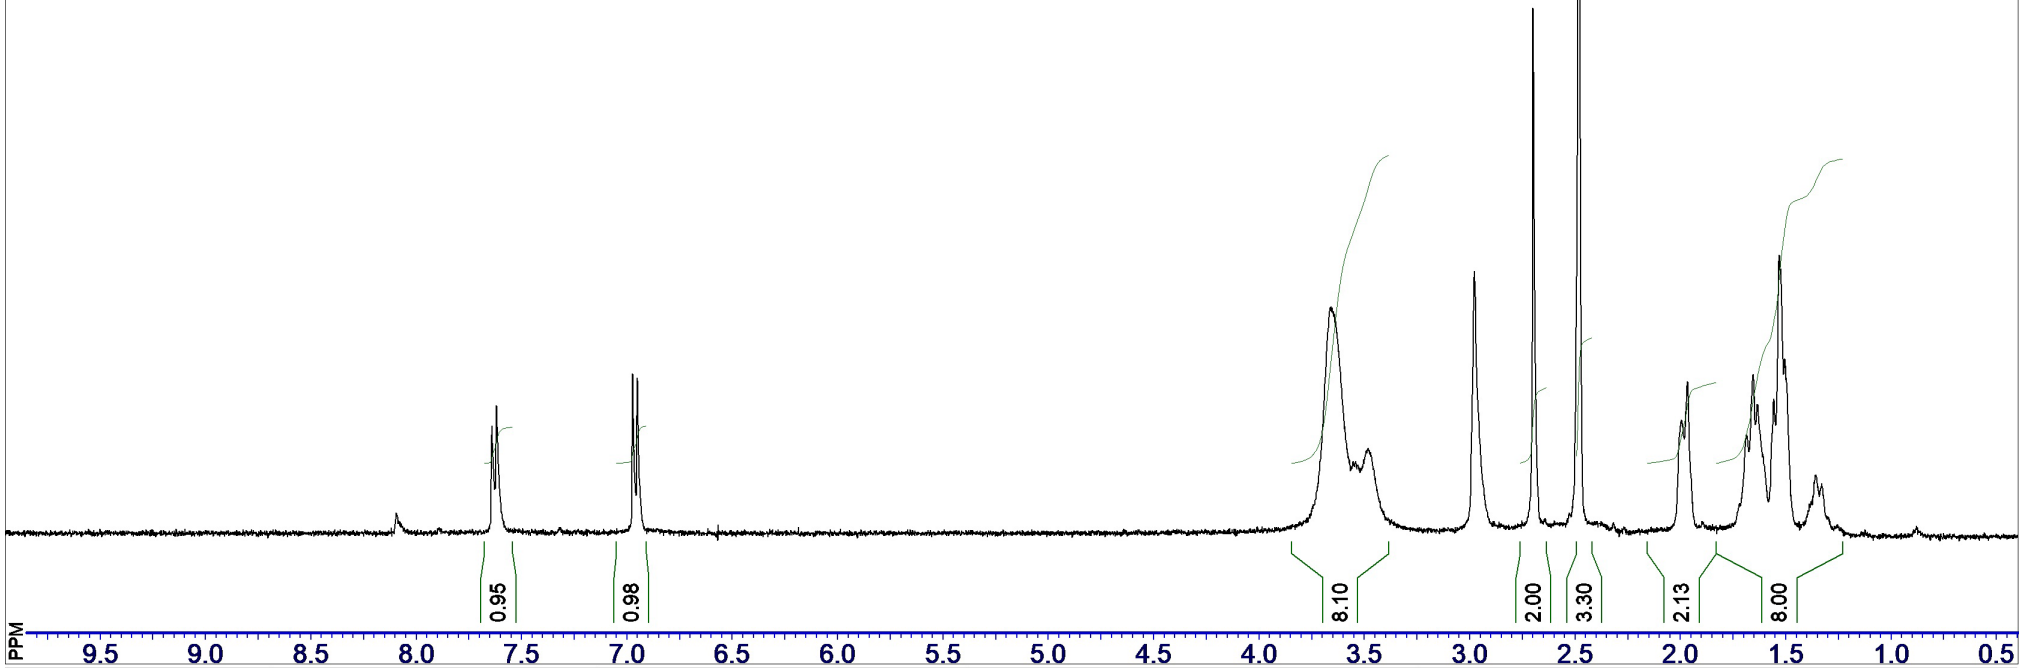

|                      |                       |                  |           |                                   |                                  |
|----------------------|-----------------------|------------------|-----------|-----------------------------------|----------------------------------|
| File name: E003-0027 | Expert: BLJ           | SF: 399.9525 MHz | NSC: 12   | PW: 12.00 usec, RG: 24, SI: 16384 | Grade: OK(00)                    |
| Date: 03-Dec-2003    | Solvent: DMSO-d6+CCL4 | SW: 7502 Hz      | TE: 300 K | AQ: 1.09 sec, RD: 1,5 sec         | * E003- 0027. 03- Dec- 2003. 00* |

## Qualitative Analysis Report

|                               |                                                     |                                 |                                 |
|-------------------------------|-----------------------------------------------------|---------------------------------|---------------------------------|
| <b>Data File</b>              | 20210304 Compound 974 MW396 BDSC18 1mlPerMin.d      | <b>Sample Name</b>              |                                 |
| <b>Sample Type</b>            | Sample                                              | <b>Position</b>                 | P2-F1                           |
| <b>Instrument Name</b>        | LC QTOF                                             | <b>User Name</b>                |                                 |
| <b>Acq Method</b>             | Small Molecule Training_1mlPerMin_7Min_30P of B.m   | <b>Acquired Time</b>            | 3/4/2021 3:49:03 PM (UTC-05:00) |
| <b>IRM Calibration Status</b> | Success                                             | <b>DA Method</b>                | default_small_molecule.m        |
| <b>Comment</b>                |                                                     |                                 |                                 |
| <b>Sample Group</b>           |                                                     |                                 |                                 |
| <b>Stream Name</b>            | LC 1                                                | <b>Info.</b>                    |                                 |
| <b>Acquisition SW Version</b> | 6200 series TOF/6500 series Q-TOF B.08.00 (B8058.0) | <b>Acquisition Time (Local)</b> | 3/4/2021 3:49:03 PM (UTC-05:00) |
| <b>QTOF Firmware Version</b>  | 20.698                                              | <b>QTOF Driver Version</b>      | 8.00.00                         |
|                               |                                                     | <b>Tune Mass Range Max.</b>     | 3200                            |

### Chromatograms

**Fragmentor Voltage** 220 **Collision Energy** 0 **Ionization Mode** ESI

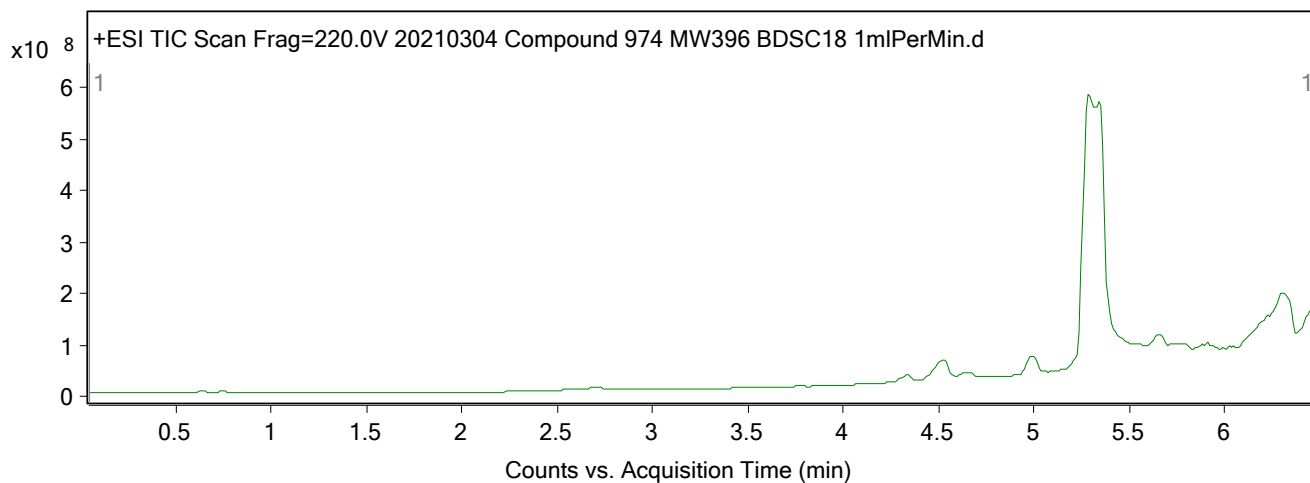

## Qualitative Analysis Report

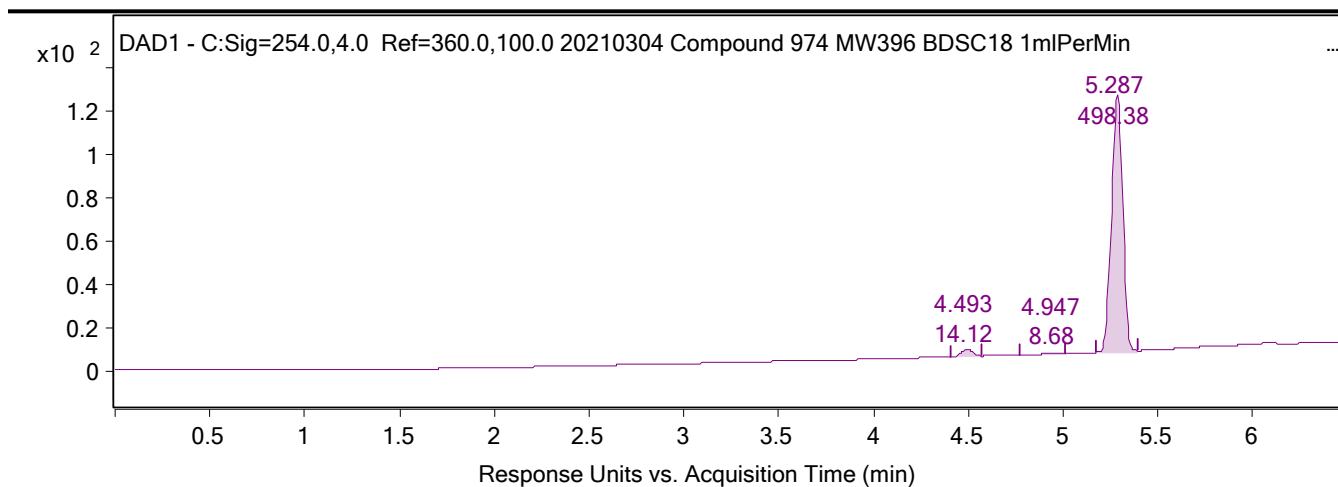

### Integration Peak List

| Peak | Start | RT    | End   | Height | Area   | Area % |
|------|-------|-------|-------|--------|--------|--------|
| 1    | 4.409 | 4.493 | 4.567 | 3.46   | 14.12  | 2.83   |
| 2    | 4.767 | 4.947 | 5.013 | 1.17   | 8.68   | 1.74   |
| 3    | 5.173 | 5.287 | 5.393 | 119.57 | 498.38 | 100    |

### Spectra

Fragmentor Voltage      Collision Energy      Ionization Mode  
220                              0                              ESI

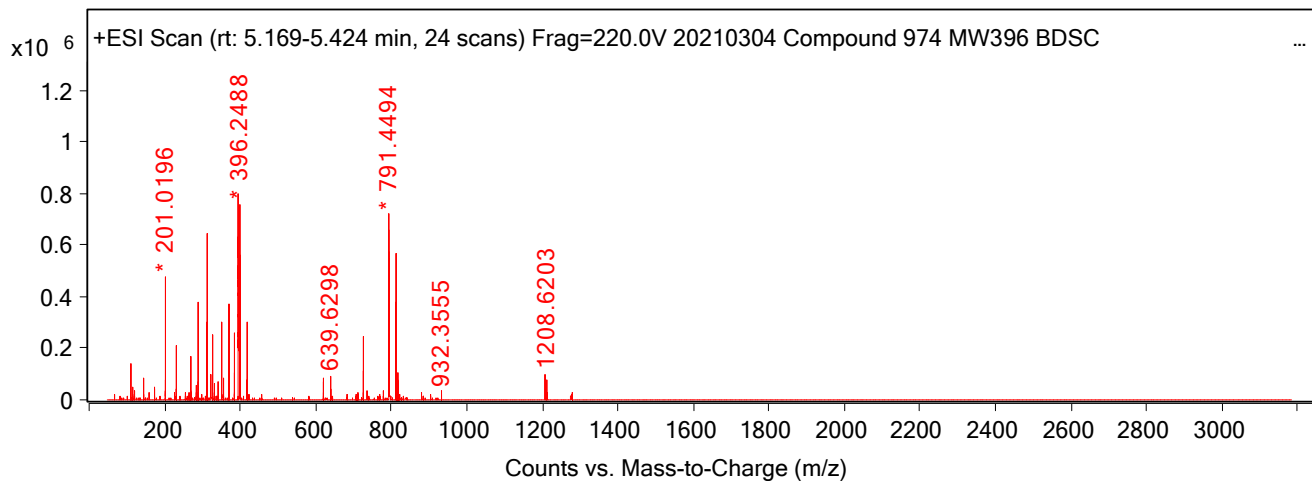

### Peak List

| m/z      | z | Abund     |
|----------|---|-----------|
| 311.133  |   | 645586.57 |
| 396.2488 |   | 798762.45 |
| 396.321  |   | 591509.59 |
| 396.3431 | 1 | 521709.27 |
| 397.2369 |   | 756142.24 |
| 398.2283 | 1 | 565682.69 |
| 791.4494 | 1 | 719473.03 |
| 792.4524 | 1 | 662074.02 |

## Qualitative Analysis Report

---

|          |   |           |
|----------|---|-----------|
| 793.4497 | 1 | 547629.32 |
| 813.4126 | 1 | 573301.13 |

--- End Of Report ---

Compound 974

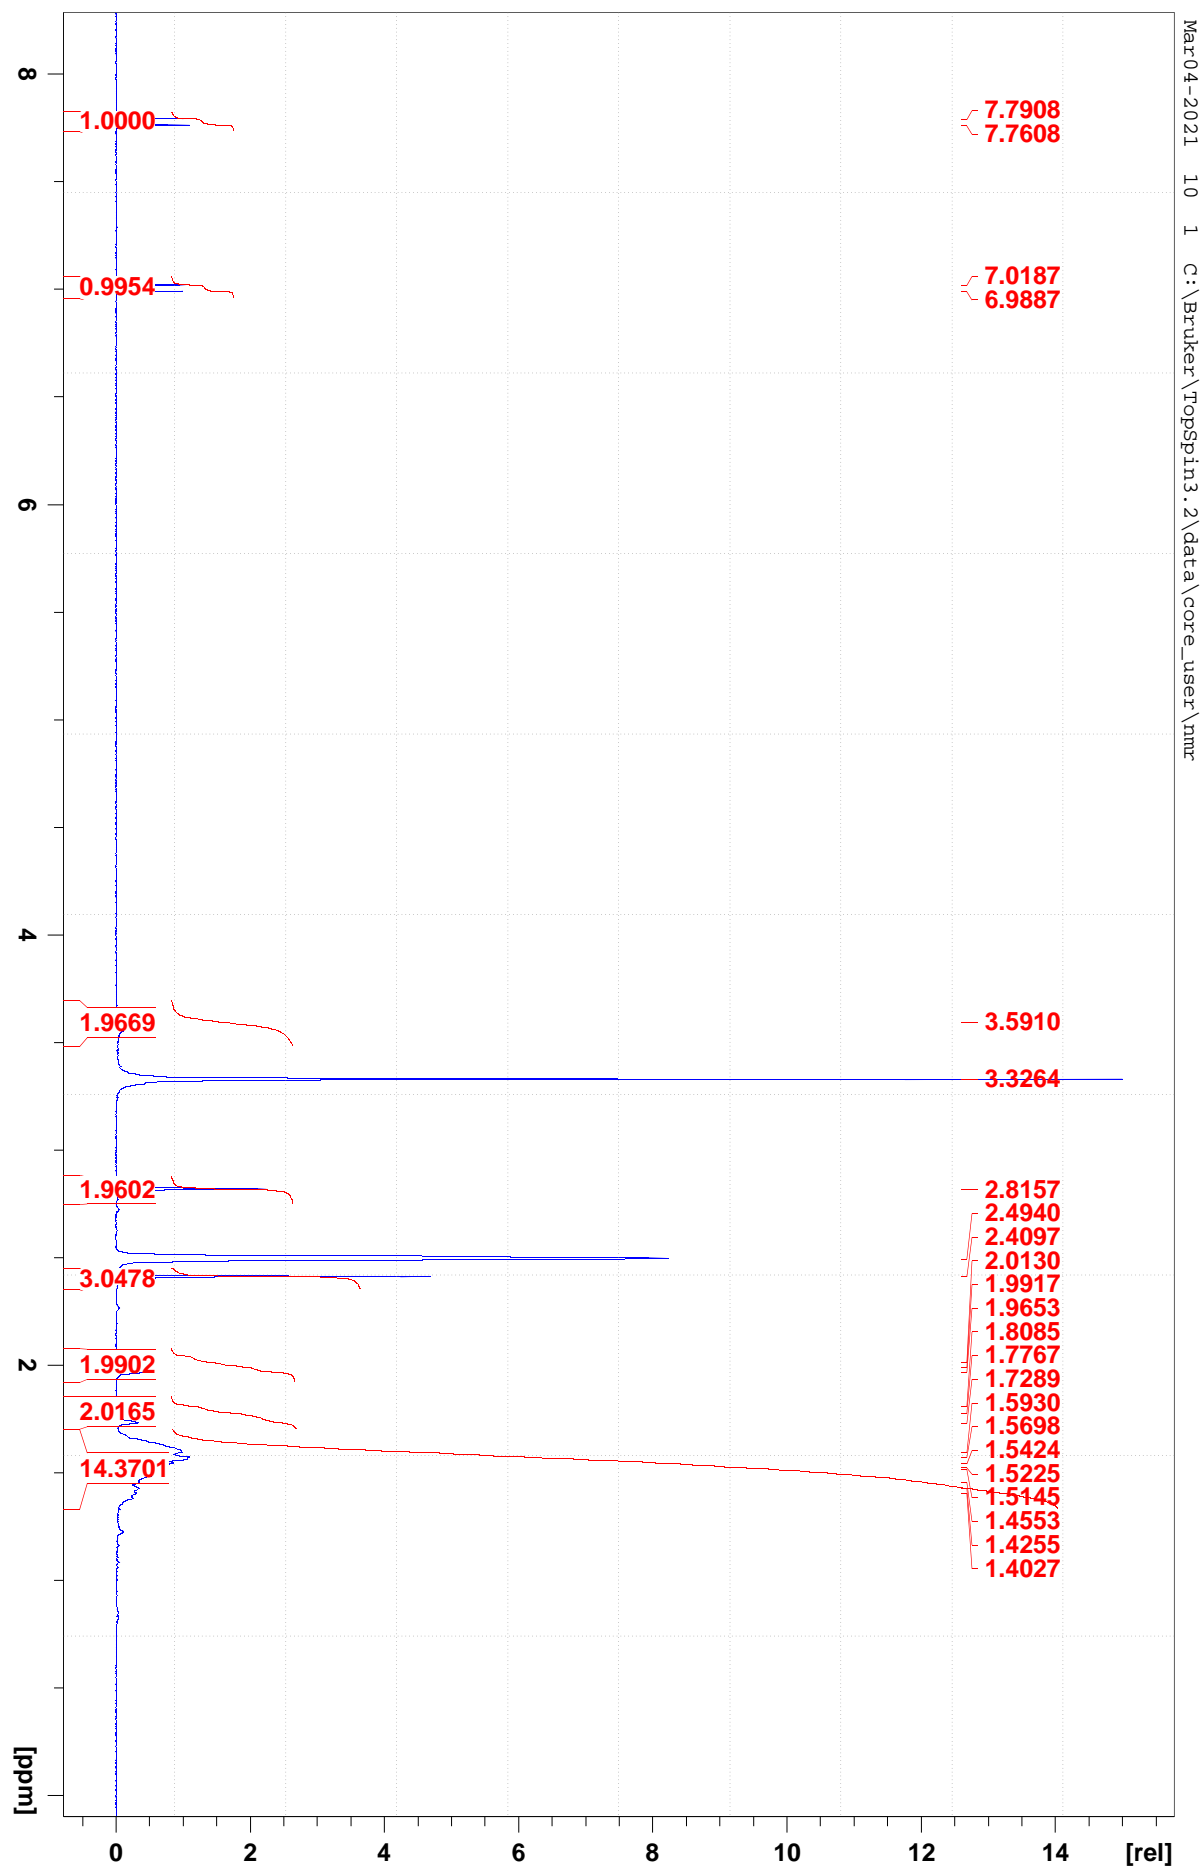

Supplement: Supplementary file 1 [file supplementary]
